# Supplementary material
Source: Springer Nature journal article supplement (https://www.springermedizin.de/resource/supplementary/12888_2012_1296_MOESM4_ESM.pdf/9479800)

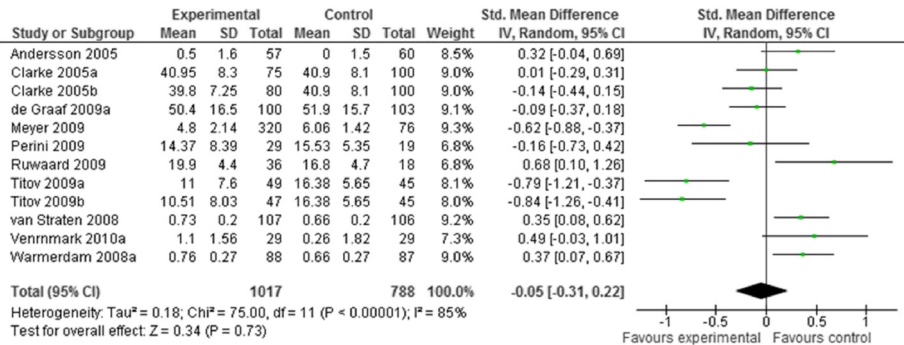

Supplement: MOESM4 [file 9479800]
